# Supplementary material for: Curcuma aromatica Salisb. Protects from Acetaminophen-Induced Hepatotoxicity by Regulating the Sirt1/HO-1 Signaling Pathway
Source: MDPI journal article supplement (doi:10.3390/nu15040808), 2023-02-04
Supplement: s1 [file s1]

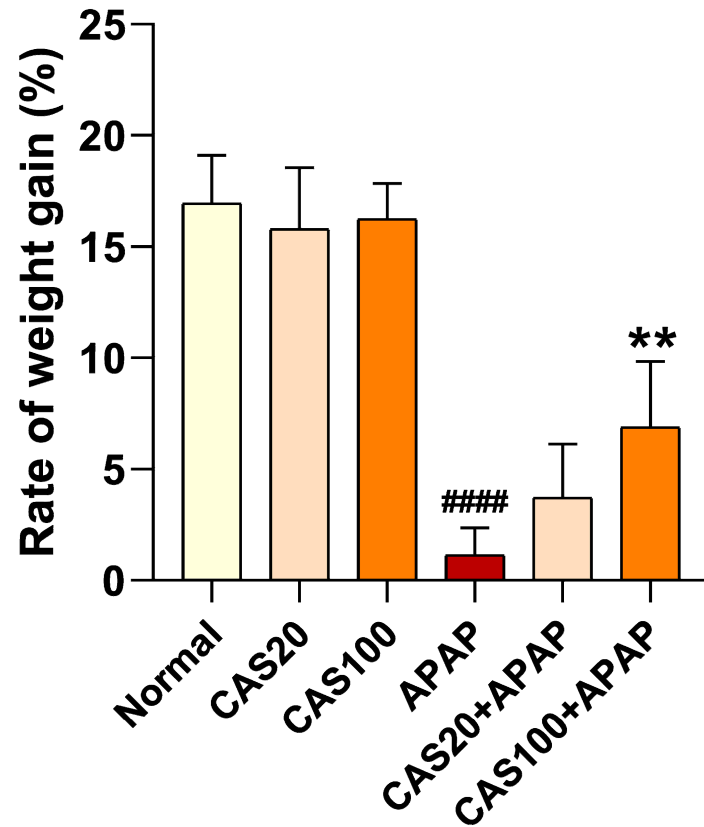

**Figure S1.** Rate of weight gain (%) in mice orally injected with acetaminophen (APAP group), or CAS at two concentrations (20, or 100  $\mu\text{g/kg}$ ) in the presence of APAP ( $n = 6$ ). The data are expressed as the mean  $\pm$  SEM and were analyzed via one-way analysis of variance with Tukey's post-hoc test. Significant differences are indicated as follows: ####  $p < 0.0001$  vs. normal group; \*\*  $p < 0.01$  vs. APAP group.

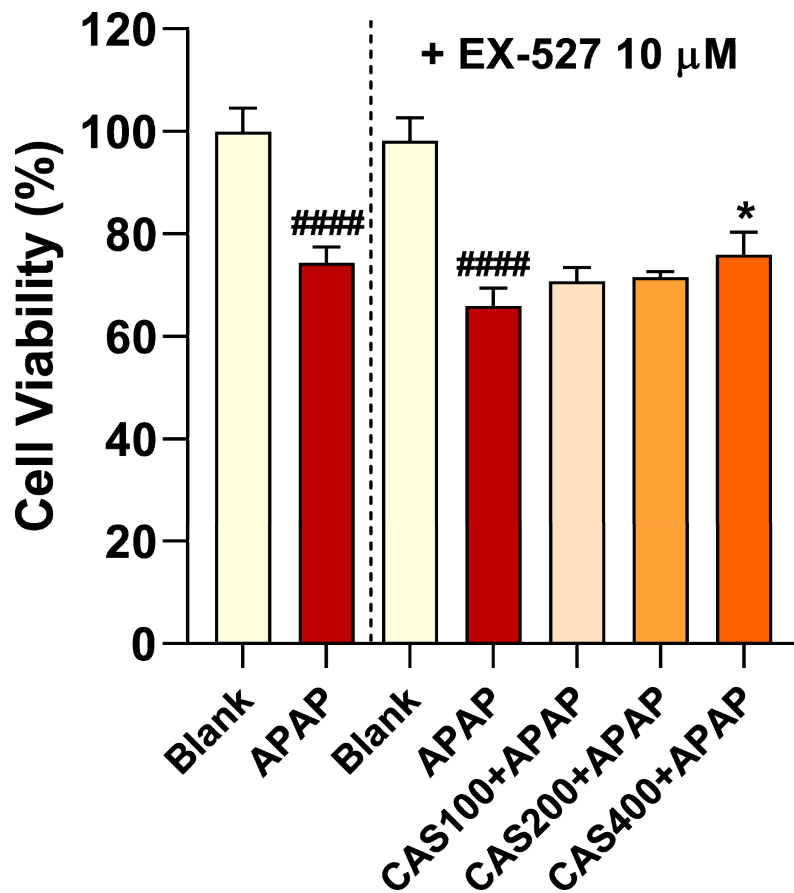

**Figure S2.** Cell viability of primary hepatocytes pretreated with CAS (100, 200, and 400  $\mu\text{g/mL}$ ) followed by subsequent exposure to Sirt1 inhibitor EX-527 with APAP for 24 h and determined by CCK-8 ( $n = 4$ ). The data are expressed as the mean  $\pm$  SEM and were analyzed via one-way analysis of variance with Tukey's post-hoc test. Significant differences are indicated as follows: ####  $p < 0.0001$  vs. blank group; \*  $p < 0.05$  vs. APAP group.

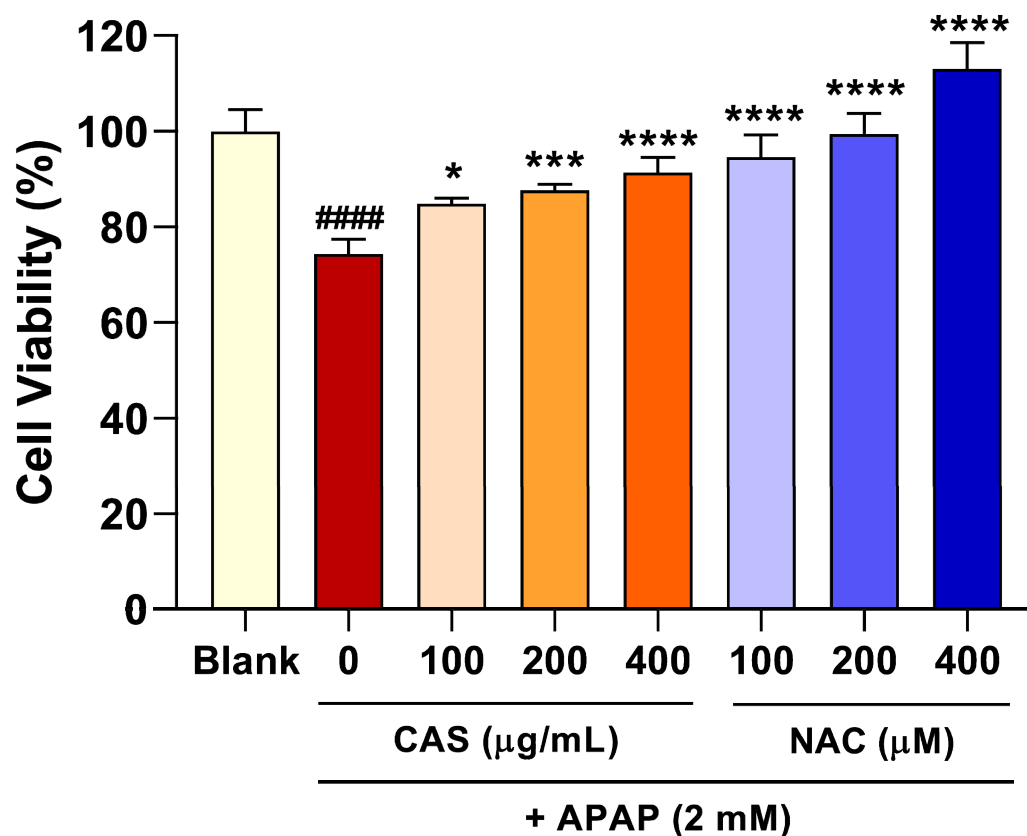

**Figure S3.** Cell viability of primary hepatocytes pretreated with CAS (100, 200, and 400  $\mu\text{g/mL}$ ) followed by subsequent exposure to ROS inhibitor NAC (100, 200, and 400  $\mu\text{M}$ ) with APAP for 24 h and determined by CCK-8 ( $n = 4$ ). The data are expressed as the mean  $\pm$  SEM and were analyzed via one-way analysis of variance with Tukey's post-hoc test. Significant differences are indicated as follows: ####  $p < 0.0001$  vs. blank group; \*  $p < 0.05$ , \*\*\*  $p < 0.001$ , and \*\*\*\*  $p < 0.0001$  vs. APAP group.
